# Supplementary material for: Comprehensive screening of genomic and metagenomic data reveals a large diversity of tetracycline resistance genes
Source: PubMed Central journal article supplement (PMC7725328; doi:10.1099/mgen.0.000455), 2020-10-30
Supplement: mgen-6-455-s001.pdf [file mgen-6-455-s001.pdf]

**Table S1:** A list of the tetracycline resistance genes that were included in the three hidden Markov models.

| Enzymatic genes |               | Ribosomal protection genes |               | Efflux genes |               |
|-----------------|---------------|----------------------------|---------------|--------------|---------------|
| Protein name    | Accession no. | Protein name               | Accession no. | Protein name | Accession no. |
| Tet(X)          | AAA27471.1    | Otr(A)                     | CAA37477.1    | Tet(D)       | CAA46706      |
| Tet(X3)         | BAC77725.1    | Tet(Q)                     | CAA79727.1    | Tet(B)       | AAB59094      |
| Tet(47)         | AKQ05891.1    | Tet(S)                     | AAA25293.1    | Tet(H)       | AAC43250      |
| Tet(48)         | AKQ05892.1    | TetB(P)                    | AAA20117.1    | Tet(Y)       | AAC72341      |
| Tet(49)         | AKQ05893.1    | Tet(M)                     | AAA73978.1    | Tet(30)      | AAD09860      |
| Tet(50)         | AKQ05894.1    | Tet(T)                     | AAF01499.1    | Tet(G)       | AAC98496      |
| Tet(51)         | AKQ05895.1    | Tet(O)                     | AAA23033.2    | Tet(J)       | AAD12753      |
| Tet(52)         | AKQ05896.1    | Tet(36)                    | CAD55718.1    | Tet(Z)       | AAD25063      |
| Tet(53)         | AKQ05897.1    | Tet(W)                     | CAA10975.1    | Tet(31)      | CAC80727      |
| Tet(54)         | AKQ05898.1    | Tet(32)                    | ABG36114.2    | Tet(33)      | CAD12227      |
| Tet(55)         | AKQ05899.1    | Tet(44)                    | CBH51823.1    | Tet(A)       | AAN06707      |
|                 |               |                            |               | Tet(39)      | AAW66497      |
|                 |               |                            |               | Tet(41)      | AAP93922      |
|                 |               |                            |               | Tet(42)      | ACD35503      |
|                 |               |                            |               | Tet(57)      | AJO67548      |
|                 |               |                            |               | Tet(59)      | AMP42440      |
|                 |               |                            |               | Tet(E)       | ABO92308      |
|                 |               |                            |               | Tet(C)       | AAK97755      |

**Table S2:** Estimated sensitivity and specificity for the three created hidden Markov models.

| Model  | Reference genes | Sensitivity |                | Specificity |                |
|--------|-----------------|-------------|----------------|-------------|----------------|
|        |                 | Full-length | Reads (100 nt) | Full-length | Reads (100 nt) |
| Enzyme | 11              | 1           | 0.96           | 1           | 0.93           |
| RPG    | 11              | 1           | 0.78           | 1           | 0.90           |
| Efflux | 18              | 0.94        | 0.89           | 1           | 0.97           |

**Table S4:** Distribution of identified previously known tetracycline resistance genes (>80% to any previously known tetracycline resistance gene) in the metagenomic datasets.

|                  | Human Gut | HMP | Pig Gut | WWTP | Pune River | Polluted River |
|------------------|-----------|-----|---------|------|------------|----------------|
| <i>Ribosomal</i> |           |     |         |      |            |                |
| <i>prot.</i>     |           |     |         |      |            |                |
| Tet(33)          |           |     | x       | x    |            |                |
| Tet(39)          |           |     |         | x    | x          | x              |
| Tet(A)           | x         | x   | x       | x    |            | x              |
| Tet(B)           | x         | x   | x       |      | x          |                |
| Tet(G)           |           |     | x       |      | x          |                |
| Tet(H)           |           |     | x       |      |            |                |
| <i>Efflux</i>    |           |     |         |      |            |                |
| Tet(32)          | x         | x   | x       |      | x          |                |
| Tet(36)          | x         |     |         |      | x          | x              |
| Tet(44)          | x         | x   |         | x    | x          |                |
| TetB(P)          | x         | x   | x       | x    | x          |                |
| Tet(W)           | x         |     |         | x    | x          |                |
| Tet(Q)           | x         |     |         |      | x          |                |
| Tet(T)           |           |     | x       |      | x          |                |
| Tet(S)           |           |     | x       | x    |            |                |
| Tet(O)           | x         |     |         |      | x          |                |
| Tet(M)           | x         |     |         |      |            |                |
| <i>Enzymatic</i> |           |     |         |      |            |                |
| Tet(X)           | x         | x   |         | x    | x          | x              |

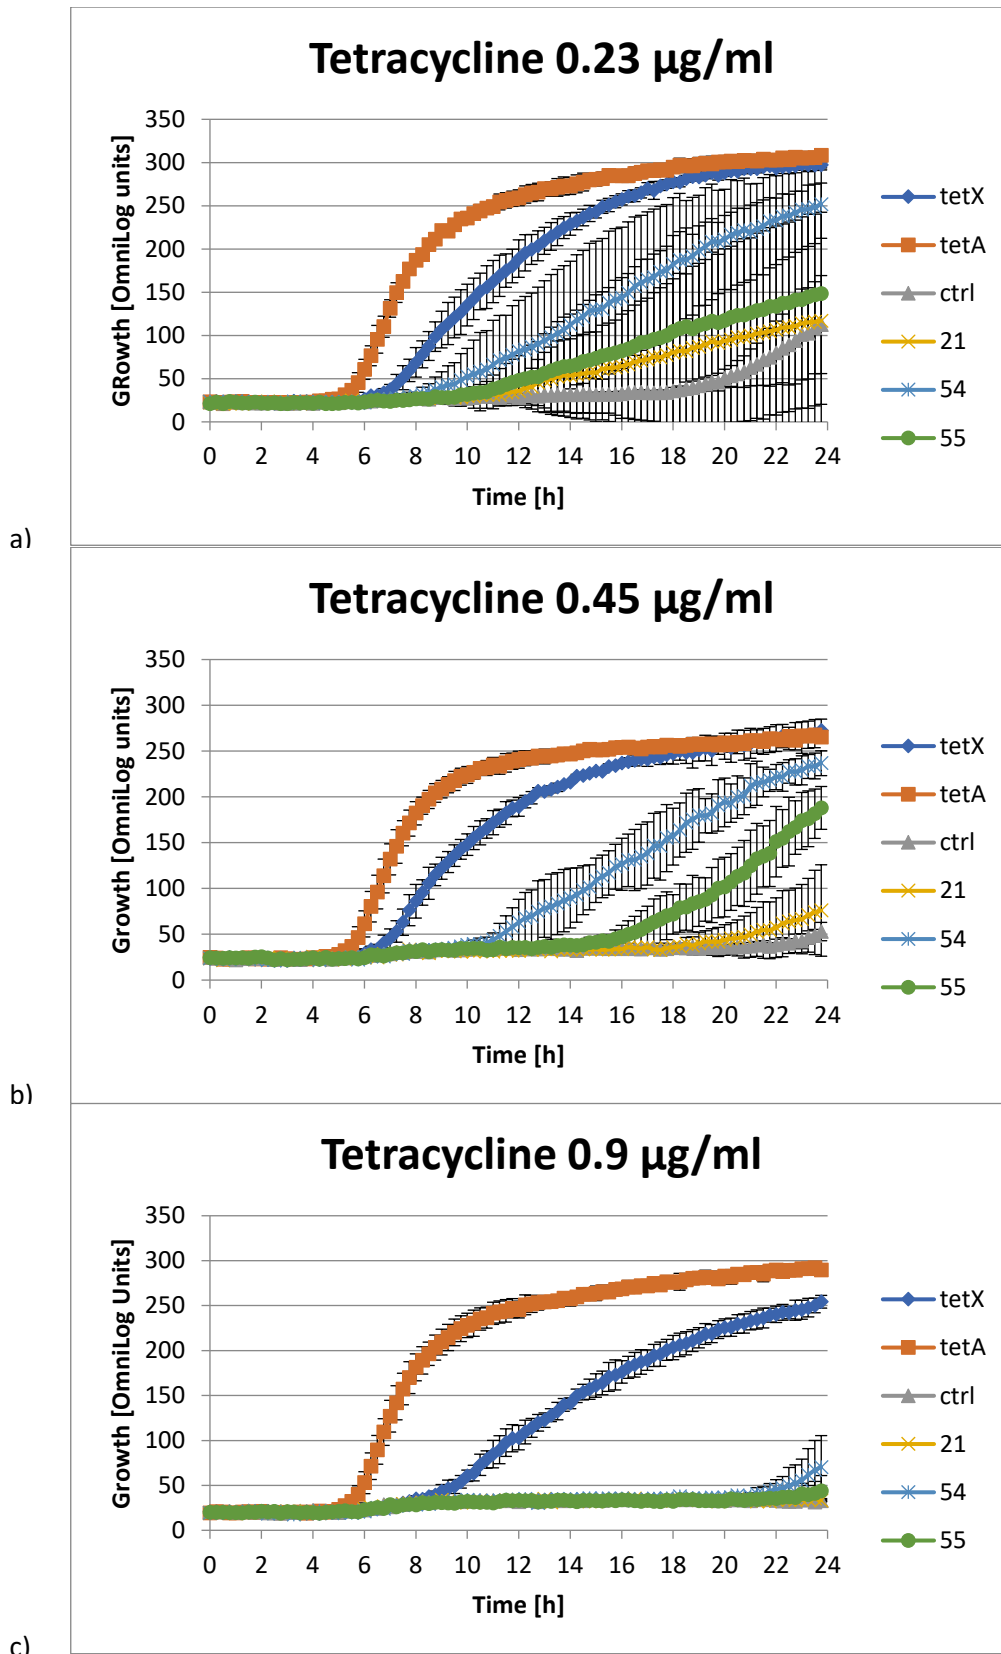

**Figure S1:** Growth behavior of three constructs (efflux pump G241 in NF21, ribosomal protection G231 in NF54 and ribosomal protection G242 in NF55) compared to Tet(X), Tet(A) and a negative control at three different tetracycline concentrations.

**Figure S2:** Phylogenetic tree of the enzymatic degradation genes with bootstrap values.

**Figure S3:** Phylogenetic tree of the ribosomal protection genes with bootstrap values.

**Figure S4:** Phylogenetic tree of the efflux pump genes with bootstrap values.

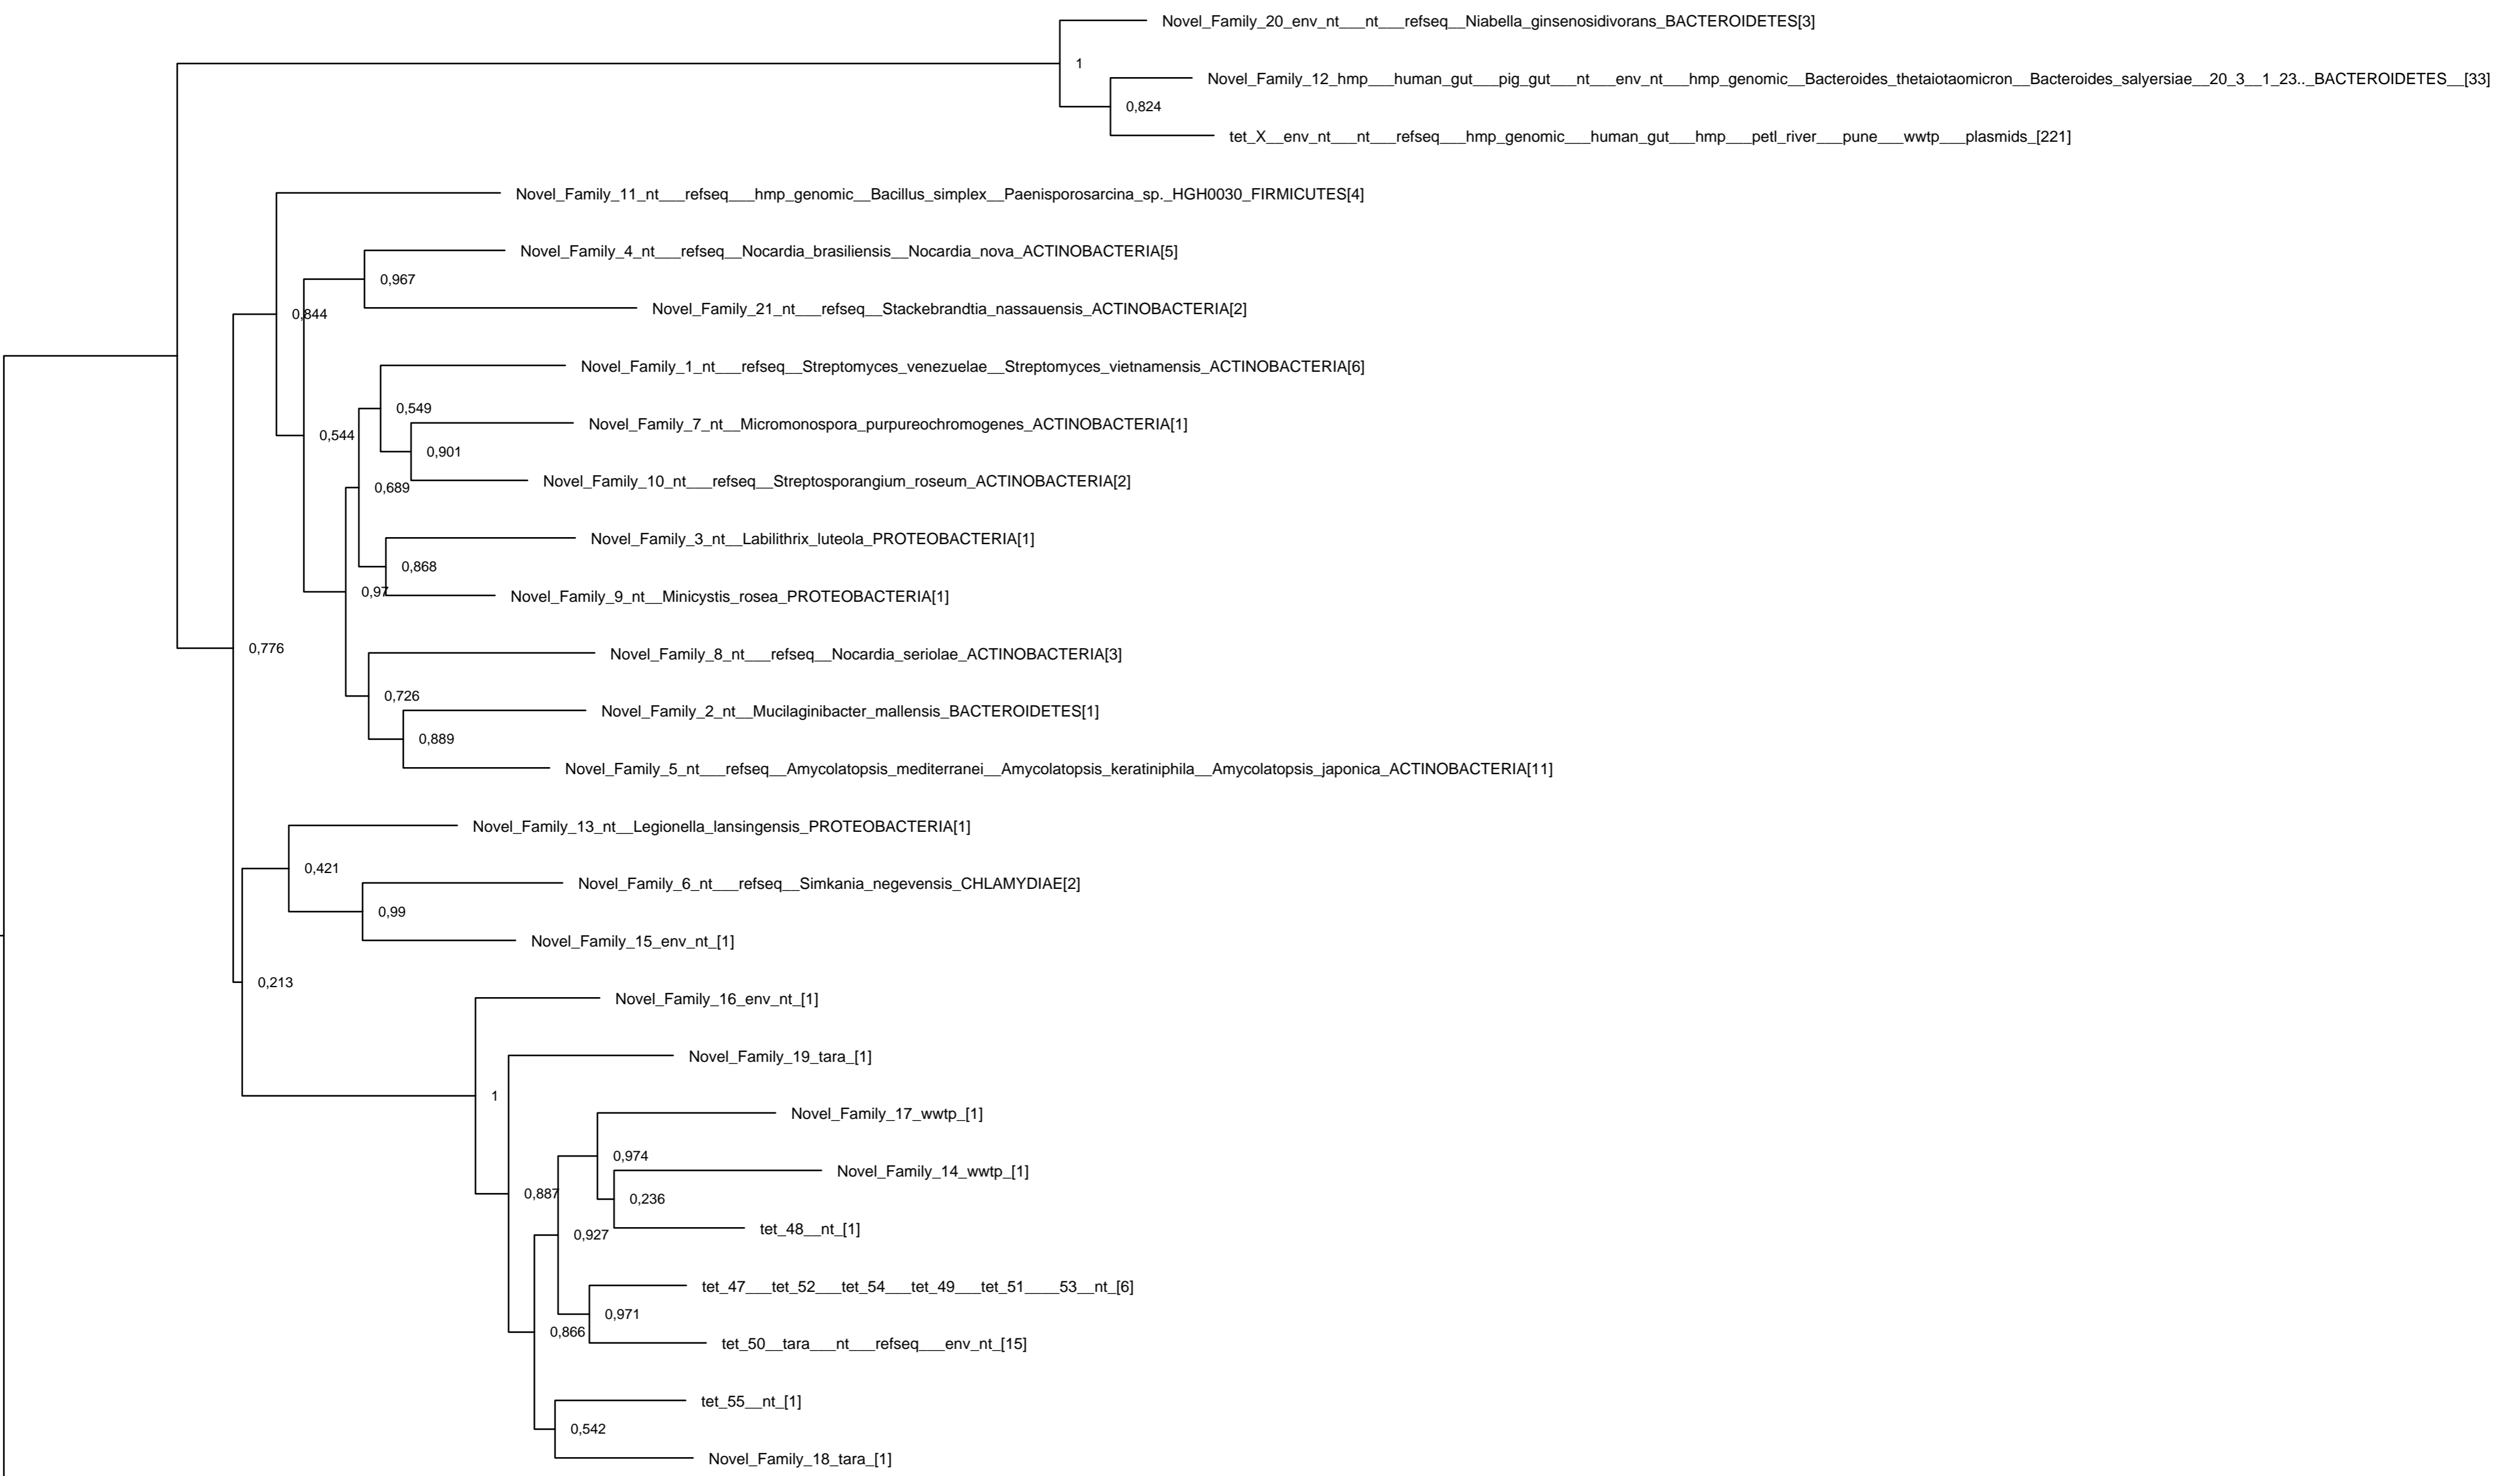

NP215089\_oxidoreductase

0.4

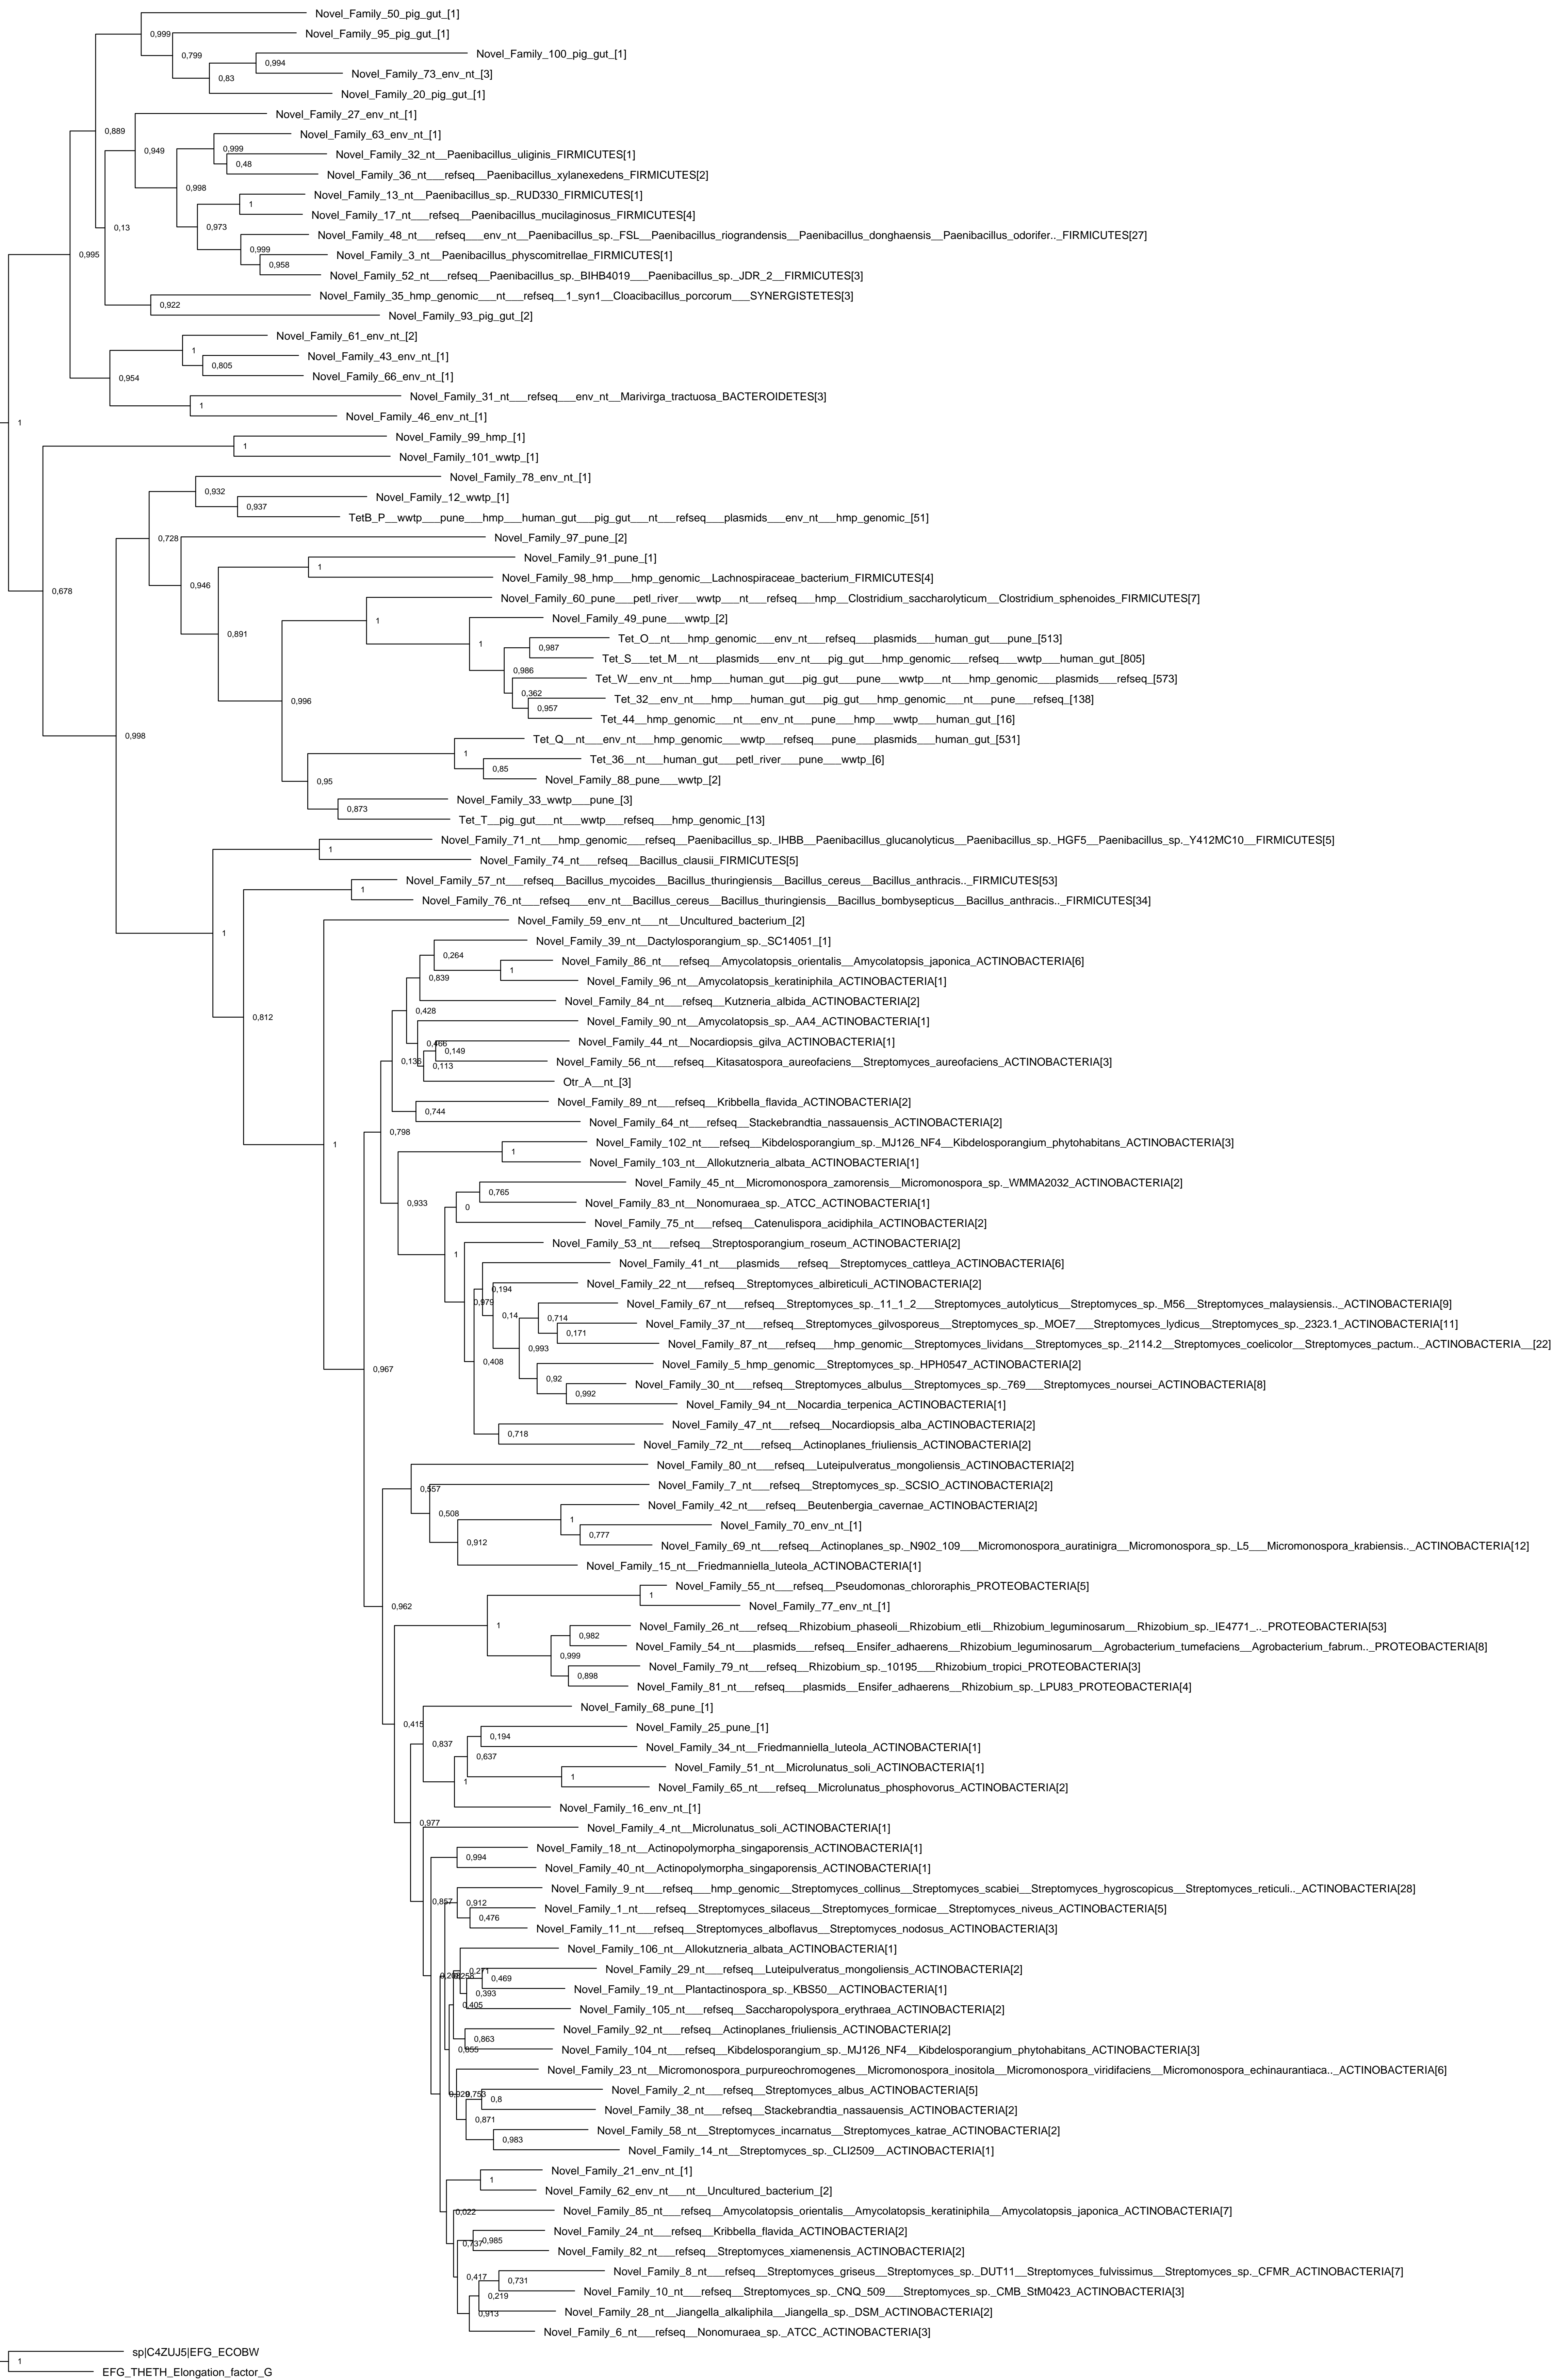

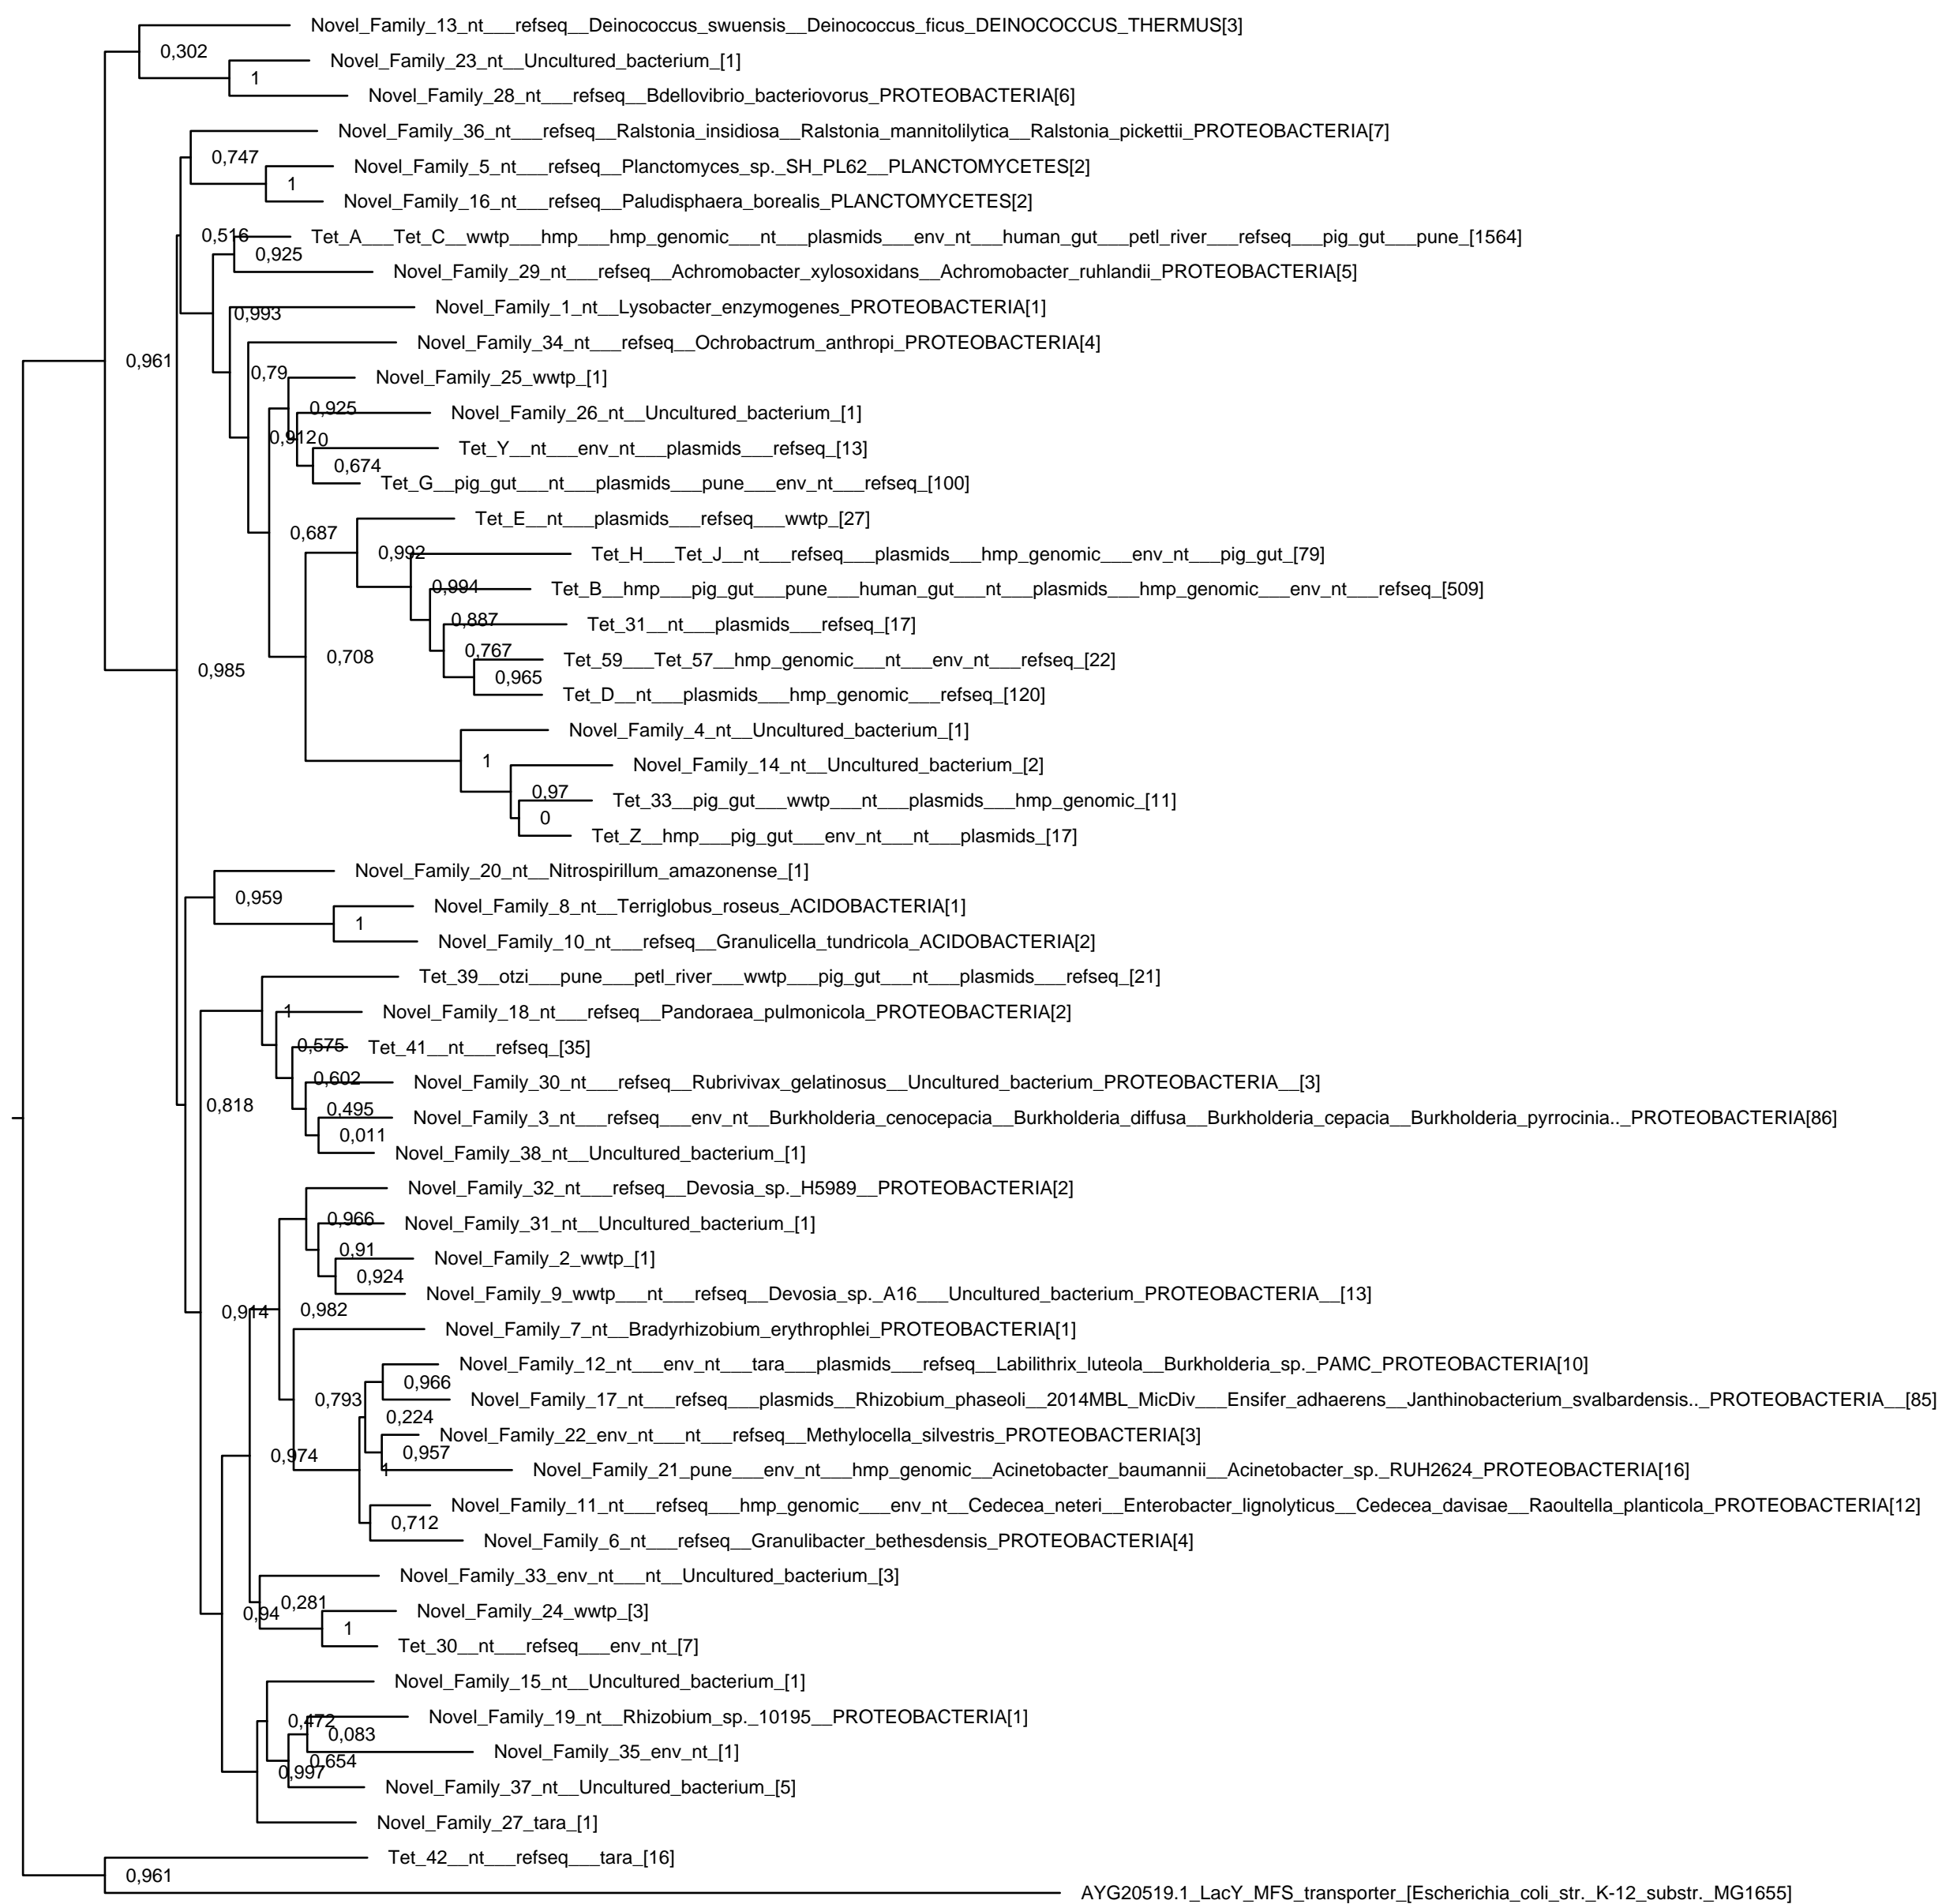

AYG20519.1\_LacY\_MFS\_transporter\_[Escherichia\_coli\_str.\_K-12\_substr.\_MG1655]

0.5
